# Supplementary material for: Simulation of bonding effects in HRTEM images of light element materials
Source: publisher site journal article supplement (doi:10.3762/bjnano.2.45), 2011-07-19
Supplement: Additional file 1 [file 2190-4286-2-45-S1.pdf]

# Supporting Information

for

## Simulation of bonding effects in HRTEM images of light element materials

Simon Kurasch<sup>\*1</sup>, Jannik C. Meyer<sup>1,2</sup>, Daniela Künzel<sup>3</sup>, Axel Groß<sup>3</sup> and Ute Kaiser<sup>1</sup>

Address: <sup>1</sup>Central Facility for Electron Microscopy, Group of Electron Microscopy of Materials Science, University of Ulm, 89081 Ulm, Germany; <sup>2</sup>New address: University of Vienna, Department of Physics, 1090 Vienna, Austria and <sup>3</sup>Institute of Theoretical Chemistry, University of Ulm, 89069 Ulm, Germany

Email: Simon Kurasch – [simon.kurasch@uni-ulm.de](mailto:simon.kurasch@uni-ulm.de)

\* Corresponding author

## WIEN2k convergence tests for ideal graphene

The WIEN2k potential calculation comes with some new input parameters, compared to an IAM simulation. In order to set up meaningful DFT calculations, these parameters need to be chosen carefully and, for new material systems, convergence tests are unavoidable.

### K-points

The first parameter we tested was the number of k-points that is needed. Therefore a number of DFT calculations of ideal graphene were set up using an increasing number of k-points. The basis size was kept constant (RKMAX = 7). The most important quantity to determine a good k-mesh is the convergence of the total energy. From Figure 1 it can be seen that the computer time per cycle scales linearly with the number of k-points, as it should be, and that the total energy is converged already for 100k.

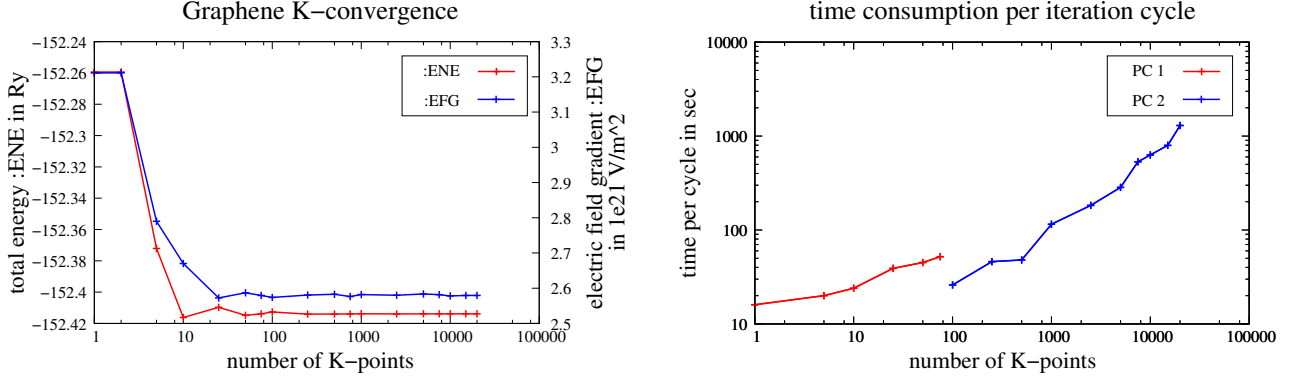

**Figure 1:** Graphene k convergence test. On the left we see the dependence of the total energy and the electric field gradient on the number of k-points. On the right the corresponding computation time is visualized.

23 As we are mainly interested in the projected potential we also checked how this quantity is influ-  
 24 enced by the number of k-points. The projected potential was calculated from a single slice parallel  
 25 to the beam direction. Each 2d slice was normalized to the smallest value and no cutoff was used  
 26 during the projection process. Four calculations (50k, 100k, 1000k and 10000k) were compared  
 27 to the calculation with the highest number of k-points that was performed (20000k). The range  
 28 of the absolute difference (left side of Figure 2) for each calculation is relatively small while the  
 29 absolute high of the difference plot is probably very sensitive to the normalization. On the right  
 30 side of Figure 2 we see the relative difference between the projected potentials  $V_z$  obtained for  
 31 difference numbers of k-points compared to the 20000k calculation in % that was obtained by:  
 32  $100 \cdot (V_z - V_z^{20000k}) / V_z^{20000k}$ . Surprisingly, the projected potential does not converge smoothly with  
 33 the number of k-points: The 100k calculation is in much better accordance to the 20000k calcu-  
 34 lation than the 1000k calculation. One reason might be the low DFT convergence conditions that  
 35 were used for these calculations (charge convergence: -cc 0.0001 C and energy convergence: -ee  
 36 0.0001 Ry).

37 In conclusion it can be said that 100k are enough and that the projected potential is not very sen-  
 38 sitive to the number of k-points. As the calculation time scales only linear with the number of k-  
 39 points this parameter is not critical for the quantity we are interested in.

### Influence of the number of K-points on the projected potential

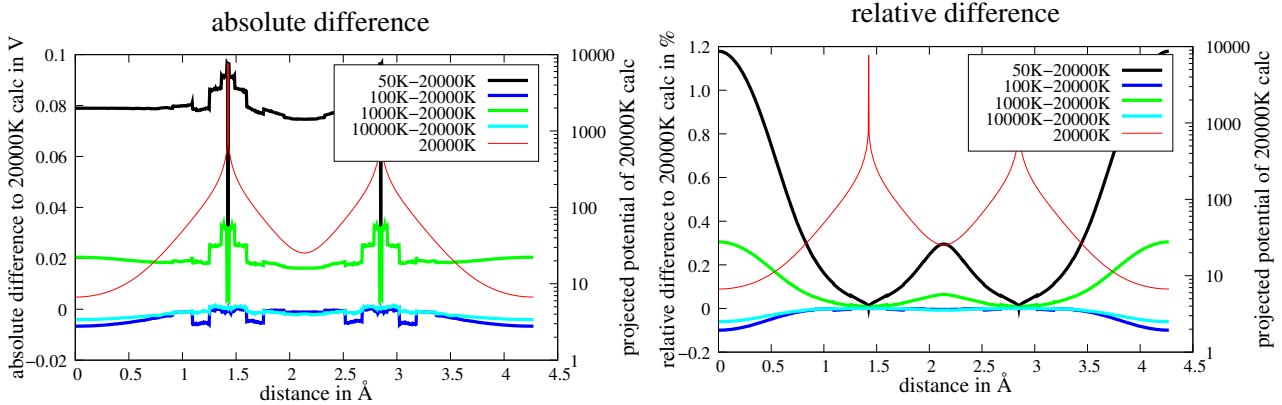

**Figure 2:** Dependence of the projected potential on the number of k-points used during the DFT calculation. The red line corresponds to the projected potential of the 20000k calculation.

### Size of the basis set

The second parameter we tested was the size of the basis set that is determined by the RKMAX value. This value was increased starting from 5.5 to 9.0 with a step width of 0.5. In contrast to the k-convergence test the DFT convergence conditions were increased to: `-cc 0.00001 C` and `-ec 0.00001 Ry`.

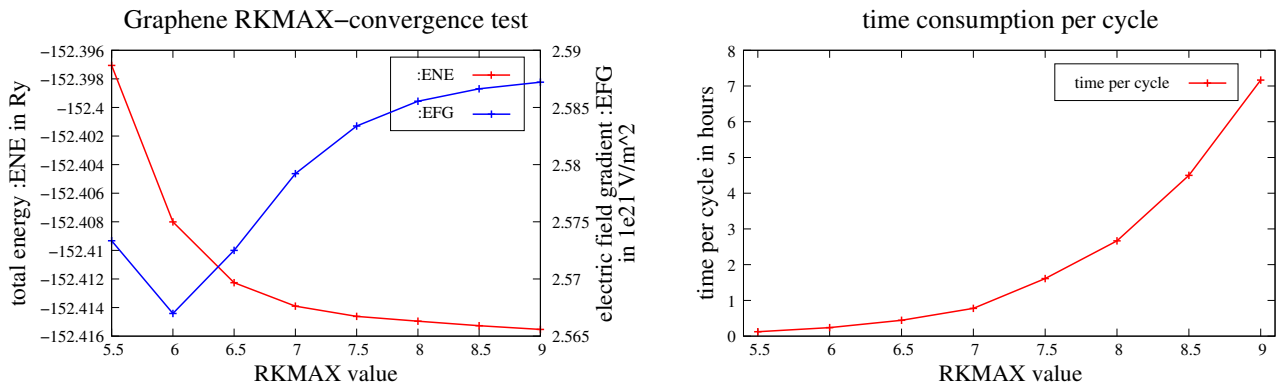

**Figure 3:** Graphene RKMAX convergence test. On the left we see the dependence of the total energy and the electric field gradient on the size of the basis set (determined by RKMAX value) used during the DFT calculation. On the right hand side we see that high values of RKMAX are very expensive from the computational point of view.

From Figure 3 we can learn that it is necessary to use a very high value of RKMAX when making DFT calculations of graphene. The WIEN2k default value is `RKMAX = 7.0` where in this study it

47 should be necessary to use a value of  $RKMAX = 9.0$ . For bigger systems this high value may not  
 48 be affordable due to strongly increasing computation time. We again calculated the projected po-  
 49 tential for several  $RKMAX$  values and compared them to the calculation with the highest accuracy.  
 50 The results are visualized in Figure 4 and we see that luckily the projected potential is not very sen-  
 51 sitive to  $RKMAX$ : The relative difference between  $RKMAX = 7$  and  $RKMAX = 9$  (green line on  
 52 the right side of Figure 4) is only 0.06% at its maximum.

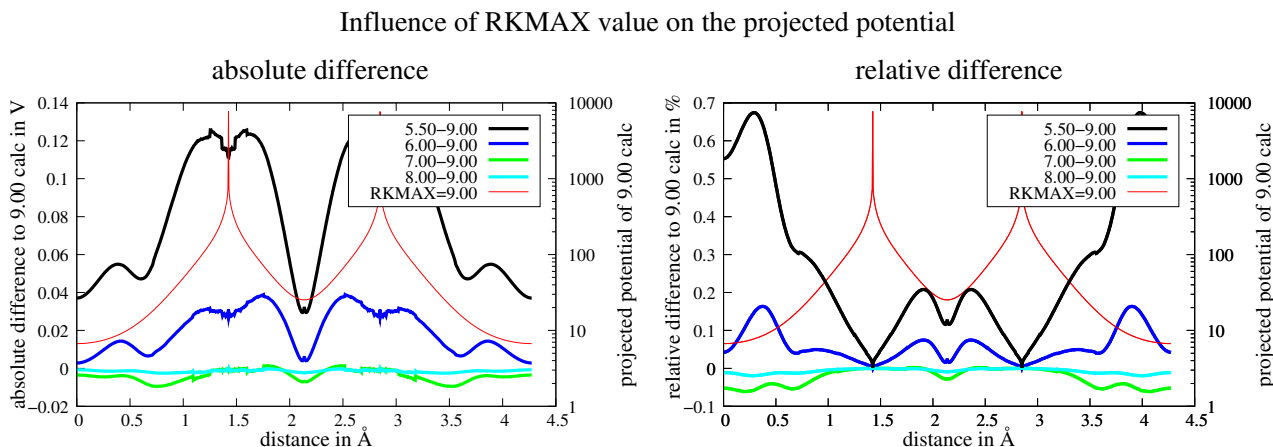

**Figure 4:** Influence of the basis set size used in the DFT calculation on the projected potential of graphene. The red line corresponds to the projected potential of the  $RKMAX = 9$  calculation.

53 For ideal graphene it is of course possible to use  $RKMAX = 9$  whereas for bigger systems calcu-  
 54 lated with  $RKMAX = 7$  the error in the projected potential due to the too small basis set should be  
 55 relatively small.

## 56 **Fourier expansion of charge density**

57 The accuracy of the Fourier expansion of the charge density is determined by  $GMAX$  where the  
 58 default value is 12. We performed DFT calculations for several  $GMAX$  values ranging from 10 to  
 59 20 with a step width of 2. All calculations were performed with  $RKMAX = 5$ , k-mesh of  $19 \times 19 \times$   
 60 1 (500k) and fine convergence conditions of  $-cc 0.00001$  C and  $-ec 0.00001$  Ry.

61 From Figure 5 we see that it should be better to increase  $GMAX$  to 16 instead of using the default  
 62 value of 12.

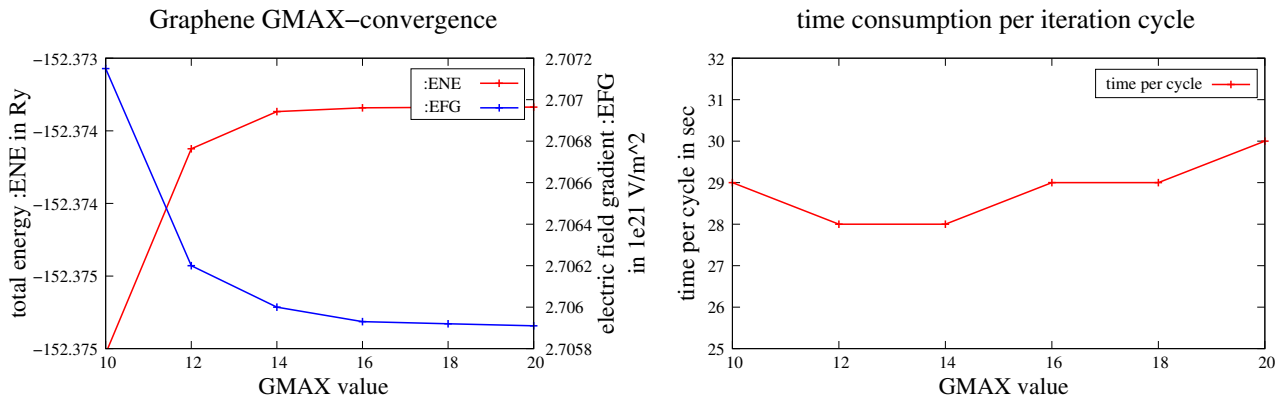

**Figure 5:** Graphene GMAX convergence test. On the left we see the dependence of the total energy and the electric field gradient on the accuracy of the Fourier expansion used during the DFT calculation. On the right hand side we see that the DFT calculation time does not depend on the GMAX value.

63 Furthermore, from Figure 5, it is possible to see that the calculation time of the SCF cycle does not  
 64 depend on the GMAX value. On the other hand the charge density and potential files are becoming  
 65 bigger when GMAX is increased as there are more Fourier coefficients. This influences the time  
 66 needed to slice these files what is visualized in Figure 6 where the time consumed to create one  
 67 slice is printed against the GMAX value.

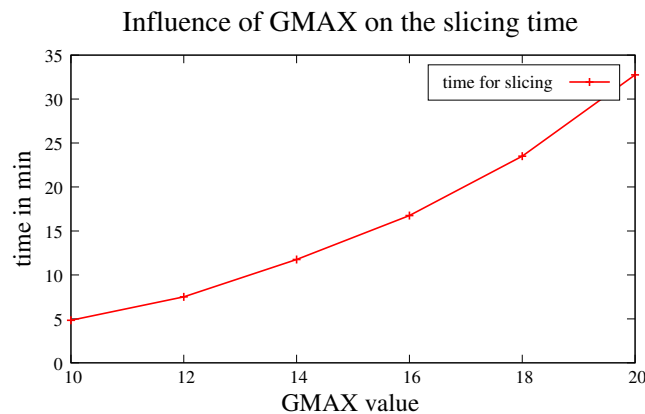

**Figure 6:** Correlation between the GMAX value and the time to create one 2d potential slice.

68 We also checked the influence of the GMAX parameter on the projected potential and found that  
 69 for GMAX = 10 the relative error is up to 4% while for the default value of 12 the error is smaller  
 70 than 0.25%.

## Influence of GMAX value on the projected potential

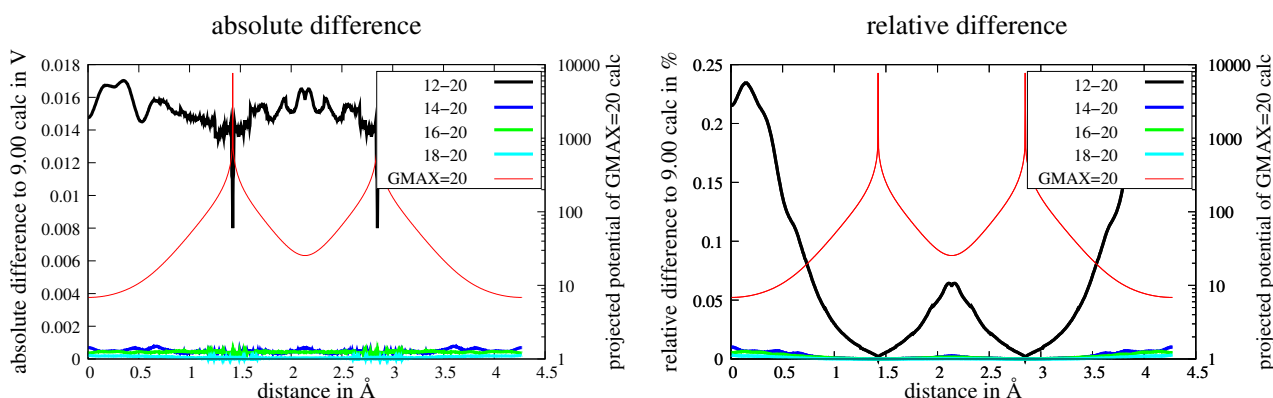

**Figure 7:** Influence of the Fourier expansion on the projected potential of graphene. The red line corresponds to the projected potential of the  $GMAX = 20$  calculation.

### 71 **Layer separation**

72 Graphene is a true 2d material in 3d space while our DFT calculations were always using 3d  
 73 unit cells and 3d periodic boundary conditions. How large do we have to make the unit cell in  $z$ -  
 74 direction to 'isolate' the graphene layers? The graphene layer separation was increased from  $5 \text{ \AA}$   
 75 to  $35 \text{ \AA}$  with a stepsize of  $5 \text{ \AA}$  and the total energy and electric field gradient were plotted against  
 76 the layer separation in Figure 8. One problem that complicates the interpretation of this study is the  
 77 fact that each calculation was using a different  $k$ -grid. We always were using 500k for the WIEN2k  
 78 input but the software constructed different  $k$ -grids with varying number of  $k$ -points for each case  
 79 so the results are not directly comparable. Nevertheless, it appears that a vacuum separation of  
 80  $20 - 25 \text{ \AA}$  is sufficient to suppress the interaction between two neighboring graphene layers.

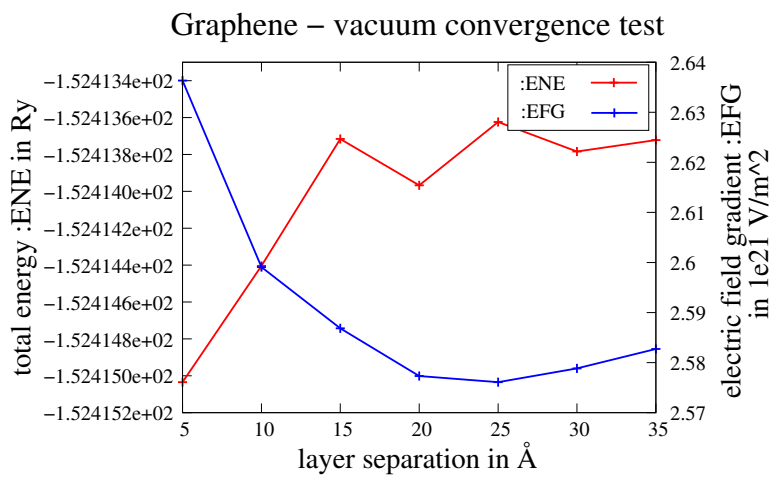

**Figure 8:** DFT calculations for graphene using different layer separations.
